# Supplementary material for: A Computational Framework for Design and Optimization of Risk-Based Soil and Groundwater Remediation Strategies
Source: MDPI journal article supplement (doi:10.3390/pr10122572), 2022-12-02
Supplement: s1 [file s1]

# A Computational Framework for Design and Optimization of Risk-Based Soil and Groundwater Remediation Strategies

Xin Wang <sup>1,2</sup>, Rong Li <sup>2,\*</sup>, Yong Tian <sup>2</sup>, Bowei Zhang <sup>2</sup>, Ying Zhao <sup>3</sup>, Tingting Zhang <sup>3</sup> and Chongxuan Liu <sup>2,\*</sup>

<sup>1</sup> School of Environment, Harbin Institute of Technology, Harbin 150090, China; 11849583@mail.sustech.edu.cn

<sup>2</sup> State Environmental Protection Key Laboratory of Integrated Surface Water-Groundwater Pollution Control, School of Environmental Science and Engineering, Southern University of Science and Technology, Shenzhen 518055, China; tiany@sustech.edu.cn (Y.T.); 12131080@mail.sustech.edu.cn (B.Z.)

<sup>3</sup> Wisdri City Environment Protection Engineering Limited Company, Wuhan 430205, China; 30087@ccepc.com (Y.Z.); 31112@ccepc.com (T.Z.)

\* Correspondence: lirong\_sustech@yeah.net (R.L.); liucx@sustech.edu.cn (C.L.)

## Text S1. The geochemical and biogeochemical reactions that affect As reactive transport in the model

### (1) Microbially mediated reduction and release of Fe(III)

Microbially mediated Fe(III) reduction and consequent release of adsorbed As from the iron oxide surfaces into groundwater are generally considered an important As reactive transport process [1-3]. The reaction is described as below:

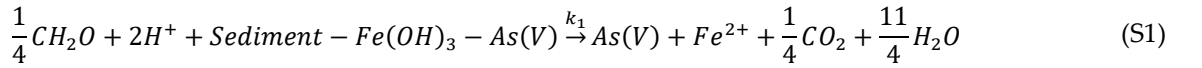

where Sediment-Fe(OH)<sub>3</sub>-As (V) denotes the As sorbed on ferrihydrite surfaces in sediments. The chemical formula of Fe(OH)<sub>3</sub> represents ferrihydrite. The abbreviations of CH<sub>2</sub>O and As(V) denote the dissolved organic carbon (DOC) and arsenate, respectively.

The kinetic rate controlling Fe(III) reduction and subsequent As release was described using the Monod expression [4].

$$R_1 = k_1 C_{Fe} \frac{C_{DOC}}{K_{DOC} + C_{DOC}} \quad (S2)$$

Here,  $k_1$  is the rate constant,  $C_{Fe}$  is the concentrations of ferrihydrite,  $C_{DOC}$  is the concentrations of DOC,  $K_{DOC}$  is the half saturation constants with respect to DOC.

### (2) Fe (II) oxidation

Fe (II) oxidation was described using the following reaction and rate expression [5]:

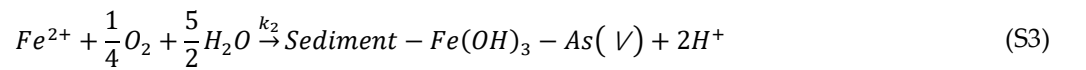

$$R_2 = k_2 C_{Fe^{2+}} C_{O_2} \quad (S4)$$

Here,  $k_2$  is the rate constant,  $C_{Fe^{2+}}$  is concentrations of Fe (II),  $C_{O_2}$  is concentrations of solved oxygen (DO).

### (3) Aerobic respiration

Aerobic respiration is a main process that consumes DO and DOC in groundwater, which indirectly affects the Fe(III) reductive dissolution and As release. The aerobic respiration can be described as [6]:

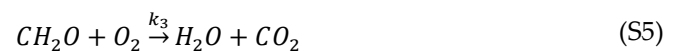

$$R_3 = k_3 \frac{C_{DOC}}{K_{DOC} + C_{DOC}} \frac{C_{O_2}}{C_{O_2} + K_{O_2}} \quad (S6)$$

Here,  $k_3$  is the rate constant,  $C_{O_2}$  and  $C_{DOC}$  are the concentrations of DO and DOC,  $K_{DOC}$  and  $K_{O_2}$  are the half saturation constants with respect to DOC and DO, respectively.

(4) *DOC production from particulate organic carbon (POC) transformation*

The following reaction and rate expression were used to describe the process of DOC production from POC [5].

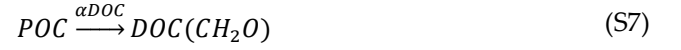

$$R_4 = \alpha_{DOC}(K_{d,DOC}C_{DOC} - C_{POC}) \quad (S8)$$

Here,  $\alpha_{DOC}$  is the first-order mass transfer coefficients for DOC,  $K_{d,DOC}$  is distribution coefficients of DOC between groundwater and soil particle,  $C_{DOC}$  is concentration of DOC, POC is particulate organic carbon.

**Table S1.** Hydrogeological parameters used in this study.

| Parameters     | Porosity | K (m/d) |
|----------------|----------|---------|
| Fill layer     | 0.4      | 1       |
| Sand layer     | 0.358    | 0.8     |
| Silty layer    | 0.3      | 0.05    |
| Bed Rock layer | 0.2      | 0.001   |

**Table S2.** Reaction parameters used in this study.

| Parameters     | Unit      | Value                                 |
|----------------|-----------|---------------------------------------|
| $k_1$          | 1/s       | <sup>[5]</sup> $2.78 \times 10^{-8}$  |
| $K_{DOC}$      | mol/L     | <sup>[4]</sup> $2.89 \times 10^{-4}$  |
| $k_2$          | L/(mol·h) | <sup>[6]</sup> 1500                   |
| $k_3$          | mol/(L·s) | <sup>[4]</sup> $6.47 \times 10^{-10}$ |
| $K_{O_2}$      | mol/L     | <sup>[4]</sup> $1.65 \times 10^{-4}$  |
| $\alpha_{DOC}$ | 1/h       | <sup>[5]</sup> $2 \times 10^{-4}$     |
| $K_{d,DOC}$    | L/g       | <sup>[6]</sup> $5 \times 10^{-2}$     |

**Table S3.** Boundary conditions of chemical species in this study.

| Parameters<br>(mol/L) | Boundary condition    |                        |
|-----------------------|-----------------------|------------------------|
|                       | Shaibei River         | Rainfall               |
| As(V)                 | $4.64 \times 10^{-8}$ | 0.00                   |
| DO                    | $1.6 \times 10^{-4}$  | $1.297 \times 10^{-3}$ |
| DOC                   | $4.76 \times 10^{-4}$ | 0.00                   |
| Fe(II)                | 0.00                  | 0.00                   |
| CO <sub>2</sub>       | $3.3 \times 10^{-2}$  | $3.3 \times 10^{-2}$   |
| pH                    | 7.25                  | 6.00                   |

**Table S4.** Optimized RFR hyperparameter values.

| Model hyperparameters | Optimum hyperparameter value |      |
|-----------------------|------------------------------|------|
|                       | Groundwater                  | Soil |
| n_estimators          | 400                          | 1000 |
| min_impurity_decrease | 0                            | 0    |
| max_features          | auto                         | auto |
| criterion             | mse                          | mse  |
| min_samples_split     | 3                            | 2    |

**Table S5.** The specific parameters of SCE algorithm in this study.

| Parameter   | Value   |
|-------------|---------|
| $P_{comp}$  | 20      |
| $n_{max}$   | 200,000 |
| $k_{stop}$  | 100     |
| $P_{cento}$ | 0.01    |

**Table S6.**  $R^2$  and NSE of the RFR model under different remediation requirement.

| Remediation requirement | $R^2$  | NSE    |
|-------------------------|--------|--------|
| Groundwater             | 0.9998 | 0.9995 |
| Soil                    | 0.9637 | 0.9965 |

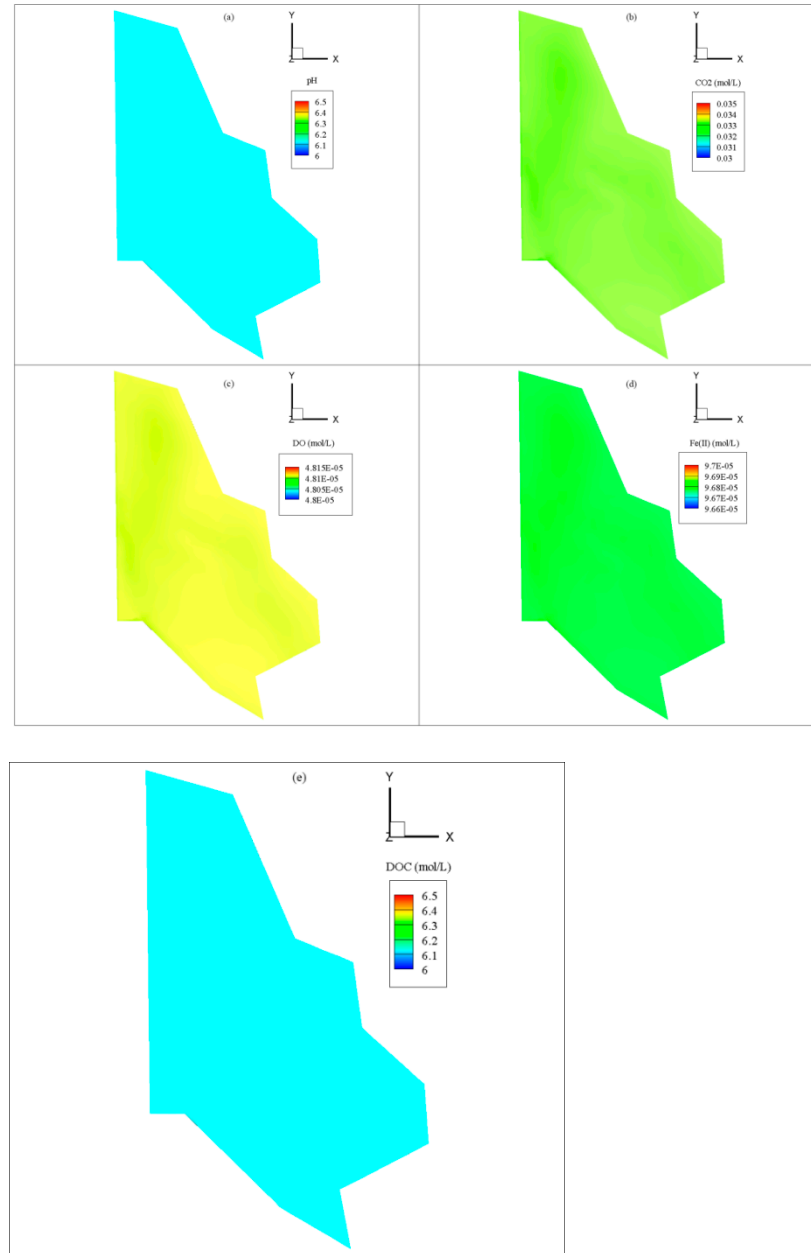

**Figure S1.** The initial distribution of pH(a), CO<sub>2</sub>(b), DO(c), Fe(II)(d) and DOC(e).

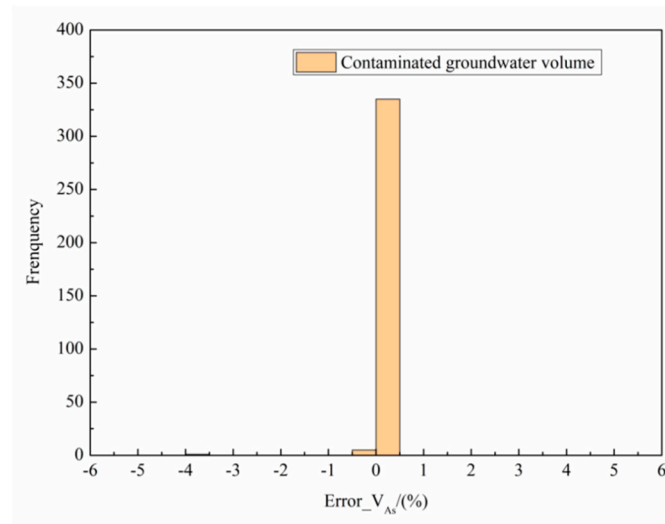

**Figure S2.** The performance of RFR model under groundwater remediation requirement.  $Error\_V_{As} = (V_{As\_RFR} - V_{As\_Process}) / V_{Water\_total}$ . Here,  $V_{As\_RFR}$  and  $V_{As\_Process}$  are the volumes of groundwater with As concentration exceeding 10 ug/L obtained from RFR model and process-based model, respectively.  $V_{Water\_total}$  is the total contaminated groundwater volume with As concentration exceeding 10 ug/L.

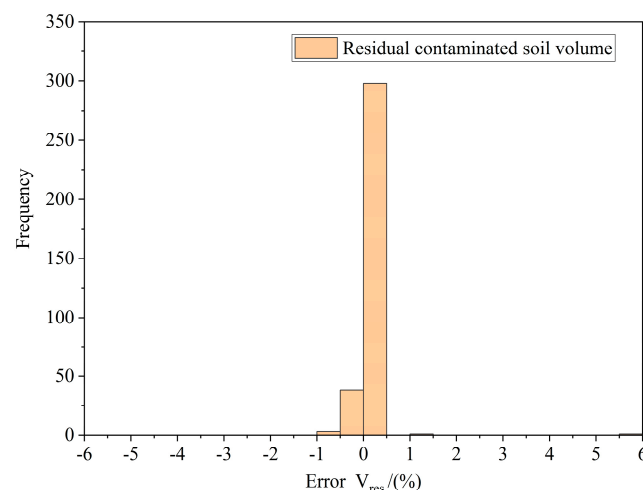

**Figure S3.** The performance of RFR model under soil remediation requirement.  $Error\_V_{res} = (V_{res\_RFR} - V_{res\_Process}) / V_{As\_total}$ . Here,  $V_{res\_RFR}$  and  $V_{res\_Process}$  are the residual contaminated soil volumes obtained from RFR model and process-based model, respectively;  $V_{As\_total}$  is the total contaminated soil volume with As concentration exceeding 60 mg/kg.

## References

1. Jones, C.A.; Langner, H.W.; Anderson, K.; McDermott, T.R.; Inskeep, W.P. Rates of microbially mediated arsenate reduction and solubilization. *Soil Sci Soc Am J* **2000**, *64* (2), 600-608.
2. Postma, D.; Jessen, S.; Nguyen, T.M.H.; Mai, T.D.; Koch, C.B.; Pham, H.V.; Pham, Q.N.; Larsen, F., Mobilization of arsenic and iron from Red River floodplain sediments, Vietnam. *Geochim Cosmochim Acta* **2010**, *74* (12), 3367-3381.
3. Duan, Y.H.; Gan, Y.Q.; Wang, Y.X.; Deng, Y.M.; Guo, X.X.; Dong, C.J., Temporal variation of groundwater level and arsenic concentration at Jiangnan Plain, central China. *J Geochem Explor* **2015**, *149*, 106-119.
4. Huang, K.; Liu, Y. Y.; Yang, C.; Duan, Y. H.; Yang, X. F.; Liu, C. X., Identification of Hydrobiogeochemical Processes Controlling Seasonal Variations in Arsenic Concentrations Within a Riverbank Aquifer at Jiangnan Plain, China. *Water Resour Res* **2018**, *54* (7), 4294-4308.
5. Yang, C.; Zhang, Y. K.; Liu, Y. Y.; Yang, X. F.; Liu, C. X., Model-Based Analysis of the Effects of Dam-Induced River Water and Groundwater Interactions on Hydro-Biogeochemical Transformation of Redox Sensitive Contaminants in a Hyporheic Zone. *Water Resour Res* **2018**, *54* (9), 5973-5985.
6. Liu, Y. Y.; Xu, F.; Liu, C. X., Coupled Hydro-Biogeochemical Processes Controlling Cr Reductive Immobilization in Columbia River Hyporheic Zone. *Environ Sci Technol* **2017**, *51* (3), 1508-1517.
